# Supplementary material for: A mechanistic model and therapeutic interventions for COVID-19 involving a RAS-mediated bradykinin storm
Source: eLife journal article supplement (doi:10.7554/elife.59177), 2020-07-07
Supplement: supp [file elife-59177-supp-v2.zip]

Archive with 3 entries (3 files):
- elife_poa_e59177_Transparent_Reporting_File.pdf
- elife_poa_e59177_Supplementary_file_1.xlsx
- elife_poa_e59177_Supplementary_file_2.xlsx
