# Supplementary material for: A mechanistic model and therapeutic interventions for COVID-19 involving a RAS-mediated bradykinin storm
Source: eLife journal article supplement (doi:10.7554/elife.59177), 2020-07-07
Supplement: supp [file elife-59177-supp-v2.zip › elife_poa_e59177_Supplementary_file_1.xlsx]

## Sheet: Sheet1
SRA Accession		Type		Age		Sex		Obesity		Disorders		Smoker		SRA Project
SRR11092058		bronchoalveolar lavage (BAL) fluid		32		male		Unknown		COV19		Unknown		PRJNA605983
SRR11092063		bronchoalveolar lavage (BAL) fluid		32		male		Unknown		COV19		Unknown		PRJNA605983
SRR11092056		bronchoalveolar lavage (BAL) fluid		40		male		Unknown		COV19		Unknown		PRJNA605983
SRR11092060		bronchoalveolar lavage (BAL) fluid		40		male		Unknown		COV19		Unknown		PRJNA605983
SRR11092057		bronchoalveolar lavage (BAL) fluid		49		female		Unknown		COV19		Unknown		PRJNA605983
SRR11092062		bronchoalveolar lavage (BAL) fluid		49		female		Unknown		COV19		Unknown		PRJNA605983
SRR11092061		bronchoalveolar lavage (BAL) fluid		52		female		Unknown		COV19		Unknown		PRJNA605983
SRR11092059		bronchoalveolar lavage (BAL) fluid		56		male		Unknown		COV19		Unknown		PRJNA605983
SRR11092064		bronchoalveolar lavage (BAL) fluid		56		male		Unknown		COV19		Unknown		PRJNA605983
SRR10571655		bronchoalveolar lavage (BAL) fluid		26		female		Obese		Asthma		No		PRJNA434133
SRR10571656		bronchoalveolar lavage (BAL) fluid		32		female		Obese		Non-asthma		Yes		PRJNA434133
SRR10571657		bronchoalveolar lavage (BAL) fluid		58		female		Obese		Non-asthma		No		PRJNA434133
SRR10571658		bronchoalveolar lavage (BAL) fluid		45		female		Obese		Non-asthma		Yes		PRJNA434133
SRR10571659		bronchoalveolar lavage (BAL) fluid		54		female		Obese		Non-asthma		Yes		PRJNA434133
SRR10571660		bronchoalveolar lavage (BAL) fluid		53		female		Obese		Asthma		No		PRJNA434133
SRR10571662		bronchoalveolar lavage (BAL) fluid		33		female		Obese		Non-asthma		No		PRJNA434133
SRR10571663		bronchoalveolar lavage (BAL) fluid		54		male		Obese		Asthma		No		PRJNA434133
SRR10571664		bronchoalveolar lavage (BAL) fluid		43		male		Obese		Non-asthma		Yes		PRJNA434133
SRR10571665		bronchoalveolar lavage (BAL) fluid		34		male		Non-obese		Asthma		No		PRJNA434133
SRR10571719		bronchoalveolar lavage (BAL) fluid		52		female		Non-obese		Asthma		Yes		PRJNA434133
SRR10571720		bronchoalveolar lavage (BAL) fluid		54		female		Non-obese		Asthma		No		PRJNA434133
SRR10571721		bronchoalveolar lavage (BAL) fluid		43		male		Non-obese		Asthma		Ex-smoker		PRJNA434133
SRR10571722		bronchoalveolar lavage (BAL) fluid		47		female		Non-obese		Asthma		No		PRJNA434133
SRR10571723		bronchoalveolar lavage (BAL) fluid		52		female		Obese		Asthma		No		PRJNA434133
SRR10571724		bronchoalveolar lavage (BAL) fluid		45		female		Non-obese		Non-asthma		No		PRJNA434133
SRR10571725		bronchoalveolar lavage (BAL) fluid		27		male		Obese		Asthma		No		PRJNA434133
SRR10571726		bronchoalveolar lavage (BAL) fluid		47		female		Non-obese		Asthma		Ex-smoker		PRJNA434133
SRR10571727		bronchoalveolar lavage (BAL) fluid		39		female		Non-obese		Asthma		Yes		PRJNA434133
SRR10571728*		bronchoalveolar lavage (BAL) fluid		43		male		Non-obese		Non-asthma		Yes		PRJNA434133
SRR10571730		bronchoalveolar lavage (BAL) fluid		47		male		Non-obese		Non-asthma		No		PRJNA434133
SRR10571731		bronchoalveolar lavage (BAL) fluid		40		female		Non-obese		Asthma		No		PRJNA434133
SRR10571732		bronchoalveolar lavage (BAL) fluid		26		female		Non-obese		Non-asthma		No		PRJNA434133
SRR10571733		bronchoalveolar lavage (BAL) fluid		28		male		Non-obese		Non-asthma		Yes		PRJNA434133
SRR10571734		bronchoalveolar lavage (BAL) fluid		37		female		Obese		Non-asthma		No		PRJNA434133
SRR10571735		bronchoalveolar lavage (BAL) fluid		21		female		Obese		Non-asthma		No		PRJNA434133
SRR10571736		bronchoalveolar lavage (BAL) fluid		57		male		Obese		Non-asthma		No		PRJNA434133
SRR10571737		bronchoalveolar lavage (BAL) fluid		26		male		Non-obese		Asthma		No		PRJNA434133
SRR10571738		bronchoalveolar lavage (BAL) fluid		25		male		Non-obese		Asthma		No		PRJNA434133
SRR10571739		bronchoalveolar lavage (BAL) fluid		41		male		Non-obese		Non-asthma		Yes		PRJNA434133
SRR10571741		bronchoalveolar lavage (BAL) fluid		41		male		Obese		Non-asthma		Yes		PRJNA434133
SRR10571742		bronchoalveolar lavage (BAL) fluid		30		female		Non-obese		Asthma		No		PRJNA434133
SRR10571743		bronchoalveolar lavage (BAL) fluid		55		female		Obese		Asthma		No		PRJNA434133
SRR10571744		bronchoalveolar lavage (BAL) fluid		60		female		Obese		Non-asthma		No		PRJNA434133
SRR10571752		bronchoalveolar lavage (BAL) fluid		41		female		Obese		Asthma		No		PRJNA434133
SRR10571753		bronchoalveolar lavage (BAL) fluid		59		female		Non-obese		Asthma		Ex-smoker		PRJNA434133
SRR10571754		bronchoalveolar lavage (BAL) fluid		52		female		Non-obese		Non-asthma		Yes		PRJNA434133
SRR10571755		bronchoalveolar lavage (BAL) fluid		41		male		Obese		Asthma		No		PRJNA434133
SRR10571756		bronchoalveolar lavage (BAL) fluid		57		female		Obese		Asthma		Yes		PRJNA434133
SRR10571757		bronchoalveolar lavage (BAL) fluid		29		female		Obese		Asthma		No		PRJNA434133
*Outlier by PCA. Removed from analysis.
