# Supplementary material for: A mechanistic model and therapeutic interventions for COVID-19 involving a RAS-mediated bradykinin storm
Source: eLife journal article supplement (doi:10.7554/elife.59177), 2020-07-07
Supplement: supp [file elife-59177-supp-v2.zip › elife_poa_e59177_Supplementary_file_2.xlsx]

## Sheet: TPM
Gene	MeanCOVID	MeanControl	FoldChange	Log2FoldChange	SRR11092057	SRR11092061	SRR11092062	SRR11092056	SRR11092058	SRR11092059	SRR11092060	SRR11092063	SRR11092064	SRR10571655	SRR10571656	SRR10571657	SRR10571658	SRR10571659	SRR10571660	SRR10571662	SRR10571663	SRR10571664	SRR10571665	SRR10571719	SRR10571720	SRR10571721	SRR10571722	SRR10571723	SRR10571724	SRR10571725	SRR10571726	SRR10571727	SRR10571728	SRR10571730	SRR10571731	SRR10571732	SRR10571733	SRR10571734	SRR10571735	SRR10571736	SRR10571737	SRR10571738	SRR10571739	SRR10571741	SRR10571742	SRR10571743	SRR10571744	SRR10571752	SRR10571753
					49	52	49	40	32	56	40	32	56	26	32	58	45	54	53	33	54	43	34	52	54	43	47	52	45	27	47	39	43	47	40	26	28	37	21	57	26	25	41	41	30	55	60	41	59
					Female	Female	Female	Male	Male	Male	Male	Male	Male	female	female	female	female	female	female	female	male	male	male	female	female	male	female	female	female	male	female	female	male	male	female	female	male	female	female	male	male	male	male	male	female	female	female	female	female
					COV19	COV19	COV19	COV19	COV19	COV19	COV19	COV19	COV19	Asthma	Non-asthma	Non-asthma	Non-asthma	Non-asthma	Asthma	Non-asthma	Asthma	Non-asthma	Asthma	Asthma	Asthma	Asthma	Asthma	Asthma	Non-asthma	Asthma	Asthma	Asthma	Non-asthma	Non-asthma	Asthma	Non-asthma	Non-asthma	Non-asthma	Non-asthma	Non-asthma	Asthma	Asthma	Non-asthma	Non-asthma	Asthma	Asthma	Non-asthma	Asthma	Asthma
ACE	15.2222	122.103	-8.02134	-3.00384	8.6	9.6	24.1	18.7	23.3	5.2	9.1	38.4	0	91.3	184.6	131.1	165	128.4	100	91.8	151.4	142.6	81.8	136.8	150.6	121.7	104.7	169.1	108.6	105.9	114.6	103	141.4	124.7	129.6	91.7	119.6	103.7	61.3	132.4	71.4	87.6	123.6	125	96.3	155.8	128.7	84.2	141.9
ACE2	3.06667	0.0153846	199.333	7.63904	4.6	1.1	2.7	7.5	5.4	0.7	0.8	1.7	3.1	0	0.1	0	0	0	0.1	0	0	0	0	0.1	0	0	0	0	0	0	0	0	0	0	0	0	0	0	0	0	0.1	0.1	0	0	0	0	0	0	0
AGT	15.0889	0.441026	34.2132	5.09648	18	6.2	22.9	11.2	11.2	4.5	13.7	48.1	0	0.7	0.2	0	1.1	0.1	0	5.1	1.3	0	0	1.3	0.1	0	0	0	0	0	0	0	0	0	0	0.1	0.4	0.1	2.2	0.9	0.5	0	0	0	0.7	0	2	0	0
AGTR1	4.3	0.01	430	8.74819	0	0.9	5.7	0	15.6	1.9	1.2	6.5	6.9	0	0	0	0	0	0	0	0	0	0	0	0	0	0	0	0	0	0	0	0	0	0	0	0	0	0	0	0	0	0	0	0	0	0	0	0
AGTR2	1.76667	0.01	176.667	7.46489	5.4	0.8	3.7	0	0	1.9	0.2	2.1	1.8	0	0	0	0	0	0	0	0	0	0	0	0	0	0	0	0	0	0	0	0	0	0	0	0	0	0	0	0	0	0	0	0	0	0	0	0
APLN	12.6444	0.128205	98.6267	6.62391	9.4	7.2	32.7	11	18.4	2	8.1	23.4	1.6	0.2	0.1	0.2	0	0	0.1	0.1	0.2	0.1	0.2	0.2	0.2	0.1	0.1	0	0.1	0.1	0.2	0.2	0.2	0.3	0.1	0.1	0.1	0.1	0.1	0.1	0.2	0.1	0.1	0.1	0.2	0	0.2	0.1	0.1
APLNR	31.9	0.01	3190	11.6393	61	11.8	39	33.4	51.7	5.7	15.1	61.5	7.9	0	0	0	0	0	0	0	0	0	0	0	0	0	0	0	0	0	0	0	0	0	0	0	0	0	0	0	0	0	0	0	0	0	0	0	0
BDKRB1	22.6556	0.00769231	2945.22	11.5242	11.7	5.9	28.4	45.6	36.5	0.8	12.4	58.6	4	0	0	0	0	0	0	0	0	0	0.1	0	0	0	0	0.1	0	0	0.1	0	0	0	0	0	0	0	0	0	0	0	0	0	0	0	0	0	0
BDKRB2	15.3222	0.074359	206.057	7.6869	16.3	6.7	21	19.8	14.1	5.8	9.9	40.6	3.7	0	0.1	0.1	0	0	0.4	0	0.1	0	0	0.2	0.2	0	0	0.2	0.1	0.4	0.2	0	0.1	0	0.1	0	0.1	0	0	0	0.1	0	0	0	0	0	0.2	0.1	0.1
CD44	10.0333	107.344	-10.6987	-3.41936	3.9	7.8	14	22.2	7.8	9	13.7	5.1	6.8	108.6	112.8	120.2	144.2	144.5	103.1	97.8	63.3	60.3	90.4	118.2	91	102.6	110.5	94.4	97.4	105.2	108.7	112	134.1	121.2	89.9	110	98.5	79.8	88.9	135	101.2	108.7	109.6	89.4	105.8	126.1	132.2	126.7	114.1
CPN1	6.71111	0.01	671.111	9.39041	4.1	2.9	8.9	6.4	3.2	3.4	4.7	21.2	5.6	0	0	0	0	0	0	0	0	0	0	0	0	0	0	0	0	0	0	0	0	0	0	0	0	0	0	0	0	0	0	0	0	0	0	0	0
CYP24A1	10.7333	0.0230769	465.111	8.86143	11.1	2.7	7	34.6	15.9	2.9	5.5	15.2	1.7	0	0.1	0	0	0	0	0	0.1	0	0	0	0.1	0.1	0	0	0	0.1	0.1	0	0	0	0	0	0.1	0	0	0	0	0	0	0.1	0	0	0	0.1	0
CYP3A4	2.07778	0.01	207.778	7.6989	2.7	0.6	3	4.3	0	0.8	2	5.3	0	0	0	0	0	0	0	0	0	0	0	0	0	0	0	0	0	0	0	0	0	0	0	0	0	0	0	0	0	0	0	0	0	0	0	0	0
F12	2.31111	2.70769	-1.1716	-0.228477	4	0.4	4.7	0	3.1	0.6	0.7	7.3	0	1.5	3.9	2.5	1.6	3.5	1.5	3.1	3	5.5	1.5	2.3	3.1	2.2	4	3	2.1	2.3	3.3	1.9	2.7	1.5	2.4	3	2.7	2.9	2.7	1.6	1.9	1.7	2.1	2.5	3	2.4	3.1	1.4	2.3
HAS1	23.3667	0.0025641	9113	13.1537	31.7	8.5	24.7	28.1	54	5.5	11.8	42.6	3.4	0	0	0	0	0	0	0	0	0	0	0	0	0	0	0	0	0	0	0	0	0	0	0	0	0	0	0	0.1	0	0	0	0	0	0	0	0
HAS2	4.93333	0.01	493.333	8.94642	7.2	0.9	2.7	8.4	12.6	1.7	2.1	3.9	4.9	0	0	0	0	0	0	0	0	0	0	0	0	0	0	0	0	0	0	0	0	0	0	0	0	0	0	0	0	0	0	0	0	0	0	0	0
HAS3	19.6111	0.615385	31.8681	4.99404	38.2	6.9	24.9	22.5	18.8	5.4	7.6	47.3	4.9	0.6	0.7	0.8	0.6	0.5	0.6	0.5	0.8	0.4	0.6	0.6	0.5	0.6	0.6	0.8	0.8	0.5	0.8	0.9	0.6	0.6	0.7	0.6	0.6	0.7	0.6	0.5	0.4	0.5	0.8	0.5	0.5	0.5	0.7	0.5	0.5
HYAL1	0.0333333	0.0333333	1	0	0	0	0	0	0	0	0	0.3	0	0	0	0	0	0	0.1	0	0.1	0	0	0.1	0	0	0	0	0	0	0	0.1	0	0.1	0.1	0.1	0	0.1	0.1	0	0	0.1	0	0	0	0.1	0	0.1	0
HYAL2	6.36667	30.4154	-4.77729	-2.25619	0	4.9	13.8	5.6	5.6	0	7.3	20.1	0	30.6	27.1	29.6	30.2	32.1	32.8	35.5	32	24.8	18.7	28.3	32.4	32.6	31.9	37.6	32.6	29.3	30.8	20.5	34.2	28.5	31.7	27.5	17.5	31	26.5	30.3	20.4	26.3	30	30.4	29.9	32.2	40.6	38.9	35.2
HYAL3	15.2333	2.35897	6.45761	2.691	12.8	9.7	24.8	6.9	19.9	2.4	13.5	47.1	0	2.7	1.6	3.2	1.6	3.2	3.9	2.1	3	1.7	2.4	1.4	4.2	2.3	1.9	2.8	3.2	1.4	1.8	1.4	3	2.3	2.5	2.2	1.3	3.8	1.9	1.8	1.5	3.2	2.2	2.1	1.7	2.5	2.6	2.5	3.2
HYAL4	9.16667	0.0307692	297.917	8.21877	16.1	1.6	5.2	19.2	16.8	4	2	13.3	4.3	0.2	0	0	0	0	0	0	0	0	0	0	0	0	0.3	0	0	0.6	0	0.1	0	0	0	0	0	0	0	0	0	0	0	0	0	0	0.1	0.1	0
IL2	1.98889	0.0948718	20.964	4.38984	14.8	0	0	0	0	1	1.3	0.8	0	0	0	0	0	0.1	0.1	0	0.2	0	0.1	0.1	0	0	0	0	0.2	0.7	0	0	0.1	0.1	0	0.2	0	0.2	0.2	0.1	0.1	0.3	0.1	0	0.1	0	0	0.4	0.2
KLK1	15.5889	2.61026	5.97217	2.57825	8.6	5.8	24.3	6.7	50.4	2.4	11.4	27.8	2.9	2.4	3.4	2.6	4.4	2.4	1.9	3	4	6.3	2	1.1	2.4	2.8	1.7	3.1	5.6	1.2	1.3	0.7	3	2.1	2.3	1.2	1.8	2.5	1.9	2.3	1.6	2.1	2.1	1.8	1.9	4.2	5.4	4.9	2.5
KLK10	14.9556	0.446154	33.5211	5.067	25.8	4.9	17.2	20.2	24.1	4.6	8	29.8	0	0.3	1	0.6	0.2	0.4	1.3	0.5	0.4	0.3	0.4	0.7	0.1	0.5	0.4	0.4	1	0.3	0.4	0.1	0.8	0.1	0.7	0	0.4	0.6	0.3	0.1	0.3	0	0.2	0.2	0.7	1	0.5	0.5	0
KLK11	13.6222	0.674359	20.2003	4.3363	12.7	12.7	12.9	8.4	17.6	12.3	12	18.2	15.8	0.4	1.2	0.7	0.2	0.1	2	0.2	1	0.1	0.8	2.6	1.9	0.5	0.1	2.1	0.3	0.9	1.6	0.1	0.8	0.7	0.3	0.2	0.3	0.3	0.6	0	0.7	0.2	0.1	0.4	0.4	0.3	0.2	0.2	0.5
KLK12	16.9556	0.0179487	944.667	9.88366	23.5	8	24.1	7	29.4	3.5	12.2	41.9	3	0	0	0	0.1	0	0	0	0	0	0	0.2	0	0.1	0	0	0	0.1	0	0	0	0	0	0	0	0	0	0	0	0	0	0	0	0	0.1	0.1	0
KLK13	8.42222	0.0564103	149.303	7.2221	4.8	3.1	14.1	11.1	8.3	4	5	18.2	7.2	0	0	0.2	0	0	0.1	0	0.1	0	0	0.1	0.1	0	0	0.2	0.1	0.2	0.1	0	0.1	0.1	0.1	0	0	0	0.1	0	0.1	0	0	0	0	0	0	0	0
KLK14	12.4889	0.0769231	162.356	7.34301	6.5	5.6	12	22.5	20.2	1.8	10.1	25	8.7	0	0	0	0	0	0.1	0.1	0	0.3	0.2	0.1	0.1	0.1	0.2	0.1	0.2	0.1	0.2	0	0.1	0.1	0	0.1	0	0	0.1	0	0.1	0.1	0	0	0	0	0	0.1	0.1
KLK15	20.1444	0.01	2014.44	10.9762	43.6	4.7	21	26.4	25.4	5.9	9.3	41	4	0	0	0	0	0	0	0	0	0	0	0	0	0	0	0	0	0	0	0	0	0	0	0	0	0	0	0	0	0	0	0	0	0	0	0	0
KLK2	9.17778	0.01	917.778	9.842	10.7	1.3	9.2	20.3	13.2	1.8	4.9	15.5	5.7	0	0	0	0	0	0	0	0	0	0	0	0	0	0	0	0	0	0	0	0	0	0	0	0	0	0	0	0	0	0	0	0	0	0	0	0
KLK3	11.0222	0.01	1102.22	10.1062	4	3.7	15.6	17.8	20	5.5	5.3	21.9	5.4	0	0	0	0	0	0	0	0	0	0	0	0	0	0	0	0	0	0	0	0	0	0	0	0	0	0	0	0	0	0	0	0	0	0	0	0
KLK4	10.2444	0.0128205	799.067	9.64217	27.3	4.2	15.4	0	7.1	2.3	4.1	31.8	0	0	0	0	0	0	0	0	0	0	0	0	0	0	0.1	0	0	0	0	0.1	0	0	0	0	0.2	0	0	0	0	0	0	0	0.1	0	0	0	0
KLK5	11.5556	0.01	1155.56	10.1744	17.5	4.8	15.6	18.2	18.2	4.2	4.5	17.1	3.9	0	0	0	0	0	0	0	0	0	0	0	0	0	0	0	0	0	0	0	0	0	0	0	0	0	0	0	0	0	0	0	0	0	0	0	0
KLK6	15.2889	0.00512821	2981.33	11.5417	24.3	4.7	18.8	22.7	26.5	4.1	5	31.5	0	0	0	0	0	0	0.1	0	0	0	0	0.1	0	0	0	0	0	0	0	0	0	0	0	0	0	0	0	0	0	0	0	0	0	0	0	0	0
KLK7	7.35556	0.01	735.556	9.52269	11.7	2.3	7.4	19.1	6.1	2.3	3.1	14.2	0	0	0	0	0	0	0	0	0	0	0	0	0	0	0	0	0	0	0	0	0	0	0	0	0	0	0	0	0	0	0	0	0	0	0	0	0
KLK8	7.14444	0.00512821	1393.17	10.4442	0	3.5	9.5	0	23.9	6	5.8	15.6	0	0	0	0	0	0	0.1	0	0	0	0	0	0	0	0	0	0	0	0	0	0	0	0	0	0	0	0	0	0	0	0	0	0	0	0	0.1	0
KLK9	15.9333	0.01	1593.33	10.6378	27.2	7.4	16.1	16.9	16.9	3.8	7.7	47.4	0	0	0	0	0	0	0	0	0	0	0	0	0	0	0	0	0	0	0	0	0	0	0	0	0	0	0	0	0	0	0	0	0	0	0	0	0
KLKB1	3.68889	1.31026	2.81539	1.49334	0	0.4	6	7.8	5.8	2.4	1.1	6.7	3	0.5	0.8	3.2	0.3	1.3	2.2	0.5	1.6	1.3	1.8	2.8	1.1	2.7	1.1	1.6	1.2	2	1.2	0.7	1.2	1.3	0.7	0.8	2	2.1	0.5	0.7	0.9	1.5	0.8	0.5	0.9	1.4	1.8	0.6	1.5
KNG1	6.06667	0.0025641	2366	11.2082	7.3	1.1	7.2	14.1	7.1	2.8	2.9	8.4	3.7	0	0	0	0	0	0	0	0	0	0	0	0	0	0	0	0	0	0	0	0	0	0	0	0	0	0	0	0	0	0	0.1	0	0	0	0	0
MAPK1	8.32222	107.715	-12.9431	-3.69411	3.9	9.8	10.5	4	8.1	10.7	10.6	12	5.3	99.5	106.4	136.5	111	131.1	104	116	78	69.6	80.2	127.4	92.8	110.1	111.1	118.5	101.1	124.1	116.4	116.2	99.2	108.2	103.5	86.4	93.1	85.3	100.7	129.9	101.2	101.8	121.9	111.8	84.3	106.8	129.5	118.5	117.9
MAS1	13.0444	0.00512821	2543.67	11.3127	10.5	3.1	12.7	31.6	27.1	3.3	5.4	20.4	3.3	0	0	0.1	0	0	0	0	0	0	0	0	0	0	0	0	0	0	0	0	0	0	0	0	0	0	0	0	0	0	0	0	0	0	0.1	0	0
MME	17.9333	277.769	-15.489	-3.95317	20.6	7.1	14.8	26.5	43.5	4.7	15.5	18.6	10.1	380.9	184.9	398.3	455.7	310.5	358.5	272.1	193.9	47.3	151.7	141	264.3	167.9	316.5	511.1	399.9	362.8	276.9	183.7	402.1	297.2	349.2	205	179.6	155.6	279.8	249.5	379.7	348.9	183.7	199.8	210.7	261.8	288.9	326.4	334.9
NFKB1	5.11111	46.1359	-9.02659	-3.17418	1.9	3.6	8.3	6.5	8.8	1.9	3.8	6.1	5.1	45.2	42.1	48.6	38.3	44.3	45.7	50.3	33.2	27.1	46	41.8	45.4	55.3	54.1	51.6	47.6	53.4	51.7	35.3	47.5	43.6	50.3	47.4	38.4	46.1	43.8	46.8	48.2	49.8	49.6	45.2	44	47.6	52.5	48.5	47.7
NOS1	11.9	0.01	1190	10.2167	12.4	3.6	14.5	16.4	19.8	3.2	6.6	25	5.6	0	0	0	0	0	0	0	0	0	0	0	0	0	0	0	0	0	0	0	0	0	0	0	0	0	0	0	0	0	0	0	0	0	0	0	0
NOS2	7.07778	0.251282	28.1667	4.81592	12.7	2.5	8	8.5	5.6	5.5	7.8	11.9	1.2	0	0	0	0	0	0.7	0	0.4	0	0.1	1.2	0.3	0.1	0	0.2	0.1	4.4	0.3	0	0.1	0.1	0.1	0.1	0	0	0	0	0	0.2	0	0	0.2	0	0	0.3	0
REN	3.78889	0.01	378.889	8.56563	5.2	1.8	8.3	0	4.1	1.4	3.2	10.1	0	0	0	0	0	0	0	0	0	0	0	0	0	0	0	0	0	0	0	0	0	0	0	0	0	0	0	0	0	0	0	0	0	0	0	0	0
SERPING1	53.9556	1778.04	-32.9537	-5.04237	12.5	75.5	98	13	6.5	9.8	220	47.5	2.8	1991.4	1262.2	2334.6	2284.6	1949.5	2256.2	2559.5	2807.2	2275.8	1419.4	619.4	1430.4	1904.7	1571.4	1437.2	2010	1934.4	2003.4	802.6	1332.7	1598.1	2007.8	2221.4	1383.2	2543.9	2262.5	1879.2	1456.5	1516	1468.8	1495.4	2140.3	1877	1185.7	1976.8	1862.4
TMSB4X	156.433	20464	-130.816	-7.0314	73.4	348.1	199.5	76.2	47.7	113.3	417.1	58	74.6	21654.5	18832.6	21881.8	18809.1	19707.6	18534.1	18975	21752.8	23168.5	23727.4	20772.6	19841	19459.3	21764.4	19632.3	19121.4	19654.6	21939.6	15360.8	20530.9	19057.3	20555.6	22332.6	19273.4	20030.1	19510.3	21757.9	23118.5	22084.4	19879.8	19002.2	20441	19928.3	20309.8	20511.3	19967.4
VDR	16.0333	29.7231	-1.85383	-0.890509	13.7	5.7	21.4	20.9	22.5	2.3	9.7	36.5	11.6	24.2	37.6	36.1	54.3	53.2	32.7	24.2	25	24.8	16.1	43.7	20.7	21.9	31.1	22.4	28.5	17.4	25.6	37.8	27.4	24.4	25	20.1	27.9	25.7	18.4	30.3	20.3	26.9	42.3	50.8	18.2	35.8	40.8	26.7	31.9
[truncated: 4 more columns]

## Sheet: PCA
	PC1	PC2	PC3	PC4
SRR10571655	0.15861	-0.00455097	-0.00153631	-0.139621
SRR10571656	0.158891	0.00724225	0.0202544	0.0617954
SRR10571657	0.156992	-0.00862113	-0.00305166	0.142453
SRR10571658	0.158415	-0.00178862	-0.00112353	0.110394
SRR10571659	0.157736	0.00890853	-0.00318802	0.227378
SRR10571660	0.159777	-0.00922248	0.000510622	0.0405991
SRR10571662	0.159347	-0.00413045	0.00571258	0.0647401
SRR10571663	0.157201	0.00606601	-0.00426688	0.165477
SRR10571664	0.156041	-0.000889694	-0.0102608	0.213179
SRR10571665	0.158868	-0.00455029	-0.00659269	-0.0604229
SRR10571719	0.157866	-0.0073148	-0.00190711	0.166863
SRR10571720	0.157729	-0.010112	0.00457136	-0.241655
SRR10571721	0.159942	-0.00125344	0.00589396	-0.0443176
SRR10571722	0.159905	-0.00427123	-0.00204657	0.0235964
SRR10571723	0.15913	-0.0103736	0.00105124	0.0118759
SRR10571724	0.159419	0.00534698	0.00304526	0.109352
SRR10571725	0.154349	-0.00802073	0.0129022	-0.341675
SRR10571726	0.159318	-0.00738948	0.001252	-0.0534865
SRR10571727	0.152304	-0.00185527	-0.0142297	0.194681
SRR10571728	0.156852	-0.00206646	0.00573136	-0.159257
SRR10571730	0.158076	-0.00980193	-0.00118042	-0.0558685
SRR10571731	0.159959	-0.010287	-0.00159573	-0.0364524
SRR10571732	0.156596	-0.00549716	0.00658861	-0.304589
SRR10571733	0.157772	-0.00424577	-0.00968683	0.0803762
SRR10571734	0.158517	0.00230203	-0.0093228	0.138793
SRR10571735	0.156242	-0.00677652	0.00268681	-0.180404
SRR10571736	0.159549	-0.00454815	0.0059003	-0.0847581
SRR10571737	0.157215	-0.00801869	0.00772579	-0.250957
SRR10571738	0.152595	-0.00738974	0.00949203	-0.408317
SRR10571739	0.15622	-6.64413e-05	-0.00388309	0.153577
SRR10571741	0.157666	0.00396843	-0.00535097	0.213312
SRR10571742	0.158239	-0.00851903	0.00561849	-0.104145
SRR10571743	0.16019	-0.00155776	0.00135585	0.056539
SRR10571744	0.15841	-0.00187842	-0.00437263	0.0302486
SRR10571752	0.159544	0.00669095	-0.00691444	0.00400395
SRR10571753	0.159919	-0.00381804	-0.00114418	0.0141227
SRR10571754	0.159115	0.00166137	-0.00837313	0.1688
SRR10571755	0.159253	-0.00539302	0.00631102	-0.0156091
SRR10571756	0.160179	-0.0110803	0.00225263	-0.033121
SRR10571757	0.15865	-0.00556023	-0.00312646	0.10772
